# Supplementary material for: Coarse particulate matter air quality in East Asia: implications for fine particulate nitrate
Source: Copernicus journal article supplement (doi:10.5194/egusphere-2022-1485), 2023-01-26
Supplement: Supplementary file 1 [file egusphere-2022-1485-supplement.pdf]

1 *Supplement of*

2 **Coarse particulate matter air quality in East Asia:**  
3 **implications for fine particulate nitrate**

4 Shixian Zhai et al.

5 *Correspondence to:* Shixian Zhai (zhaisx@g.harvard.edu)

6  
7

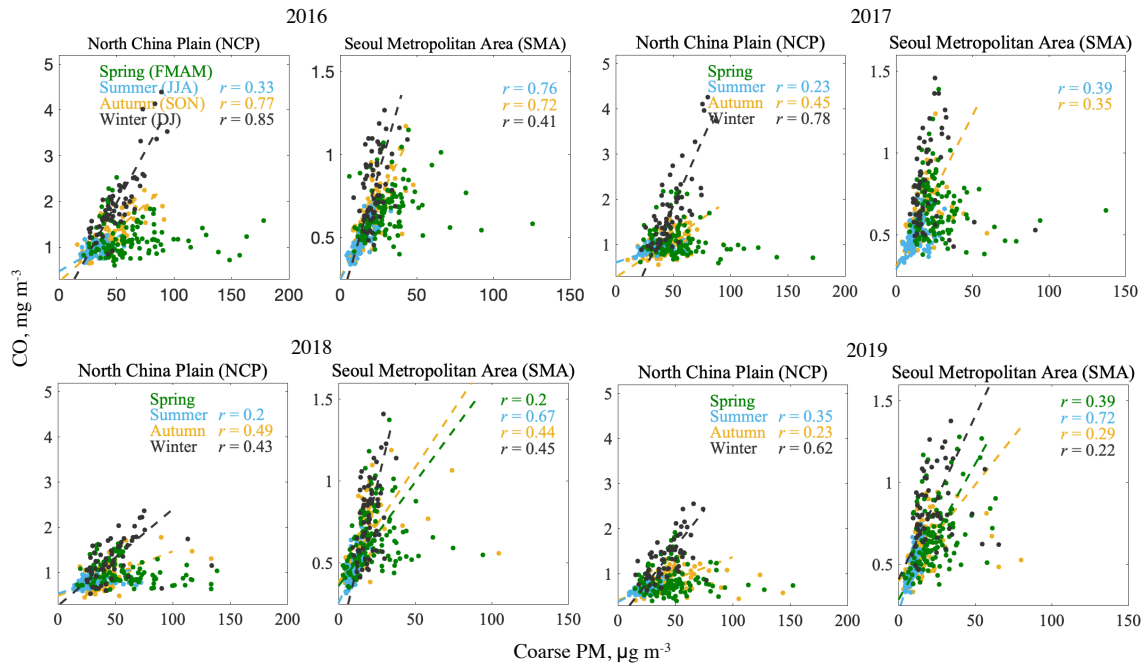

8

9 Figure S1. Daily correlations of coarse PM and CO over the North China Plain (NCP) and Seoul Metropolitan Area  
 10 (SMA). Same as Fig. 3 in the main text but for the years 2016, 2017, 2018, and 2019.

11

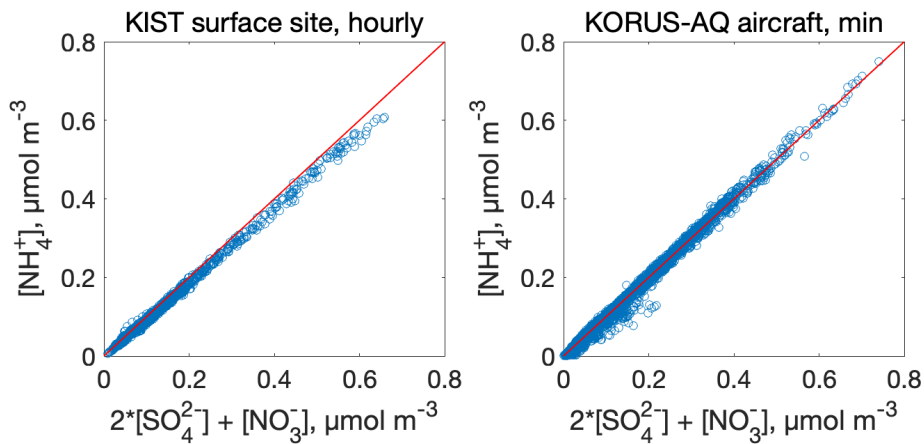

12  
 13 Figure S2. Ionic charge balance of AMS PM<sub>1</sub> during KORUS-AQ over SMA. Here the ionic charge balance is  
 14 represented by scatterplots of  $2 \cdot [\text{SO}_4^{2-}] + [\text{NO}_3^-]$  and  $[\text{NH}_4^+]$  molar concentrations at the surface KIST site (left) and on  
 15 the DC-8 aircraft (right).  $2 \cdot [\text{SO}_4^{2-}] + [\text{NO}_3^-]$  and  $[\text{NH}_4^+]$  are in charge balance, suggesting that AMS measured nitrate is  
 16 mainly inorganic nitrate that is associated with ammonium.

17

Diurnal variations of PM<sub>1</sub> nitrate and NH<sub>3</sub> at surface sites in SMA and diurnal scaling factors of NH<sub>3</sub> emission

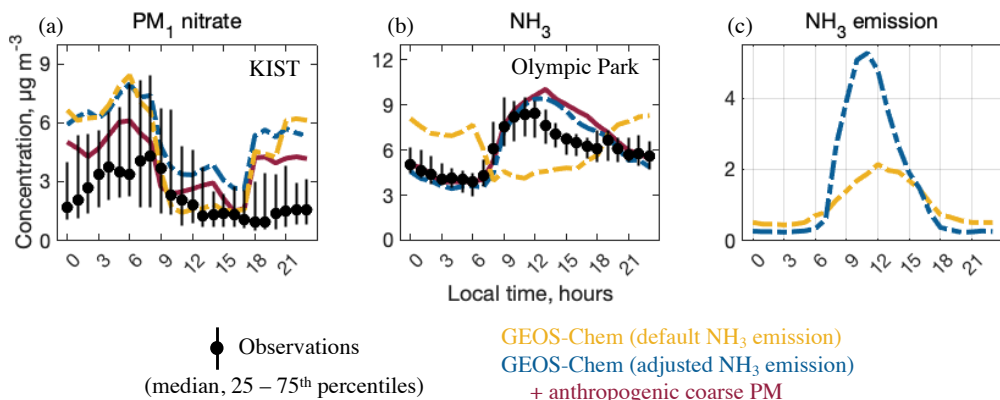

18

19 Figure S3. Effects of anthropogenic coarse PM and diurnal variations of NH<sub>3</sub> emission on PM<sub>1</sub> nitrate and NH<sub>3</sub> over  
 20 Seoul Metropolitan Area (SMA) during KORUS-AQ. Same as Fig. 4a in the main text but with the diurnal profiles of  
 21 NH<sub>3</sub> at the Olympic Park site in SMA, diurnal scaling factors of NH<sub>3</sub> emission, and GEOS-Chem model results with  
 22 default and adjusted NH<sub>3</sub> emissions added. NH<sub>3</sub> was measured by ion chromatography at the Olympic Park site in  
 23 SMA, ~7 km to the southeast of KIST. The default diurnal scaling factors of NH<sub>3</sub> emission is provided by the Multi-  
 24 resolution Emission Inventory for China (MEIC) agriculture emission sector.

25

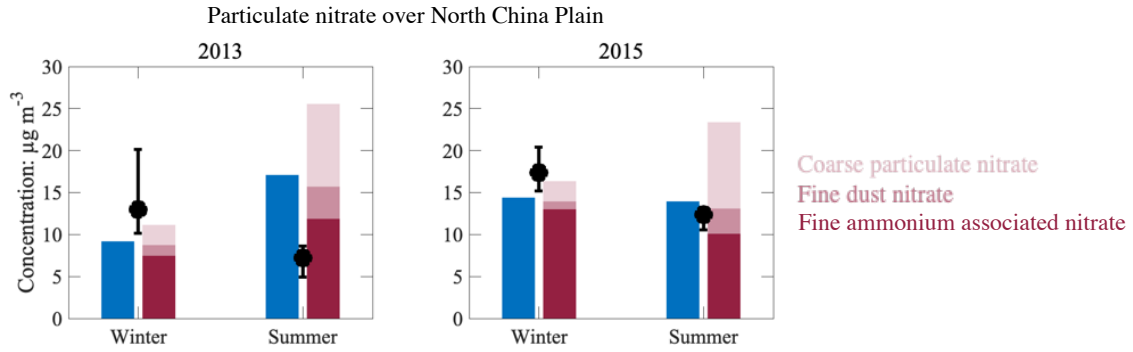

Observed PM<sub>2.5</sub> nitrate (median, 25-75<sup>th</sup> percentiles)  
 GEOS-Chem (without dust uptake of HNO<sub>3</sub> from Zhai et al. (2021))  
 + dust (natural + anthropogenic) uptake of HNO<sub>3</sub>

26

27 Figure S4. Effects of dust uptake of HNO<sub>3</sub> on winter and summer mean particulate nitrate over the North China Plain.

28 Observed PM<sub>2.5</sub> nitrate at sites in NCP and the GEOS-Chem model results without considering dust uptake of HNO<sub>3</sub>

29 are from our previous study (Zhai et al., 2021). GEOS-Chem model results are sampled at NCP observation sites.

30

31

32 Table S1 Concentrations of multi-year winter and summer mean<sup>a</sup> fine particulate nitrate observed in Beijing and Seoul,  
 33 Unit:  $\mu\text{g m}^{-3}$ . Data is visualized in Fig. 5 in the main text.

|      | Winter           |                       |                  |                   |                   | Summer |          |      |      |      |
|------|------------------|-----------------------|------------------|-------------------|-------------------|--------|----------|------|------|------|
|      | IAP <sup>b</sup> | Tsinghua <sup>c</sup> | PKU <sup>d</sup> | NIER <sup>e</sup> | KIST <sup>f</sup> | IAP    | Tsinghua | PKU  | NIER | KIST |
| 2015 | 14.6             |                       | 14.6             | 9.2               |                   | 5.0    | 8.4      | 12.4 | 0.4  |      |
| 2016 |                  |                       |                  | 7.9               | 6.6               |        |          |      | 1.3  | 1.4  |
| 2017 |                  | 16.5                  |                  | 9.4               | 8.9               |        | 7.7      |      | 0.8  |      |
| 2018 | 14.7             | 11.5                  |                  | 6.7               | 5.2               | 8.6    | 9.0      |      | 0.7  | 0.5  |
| 2019 | 11.4             | 12.8                  |                  | 10.3              | 10.5              | 6.1    | 7.6      |      | 0.7  |      |
| 2020 | 13.8             | 15.8                  |                  |                   |                   | 7.2    | 8.5      |      |      | 0.3  |
| 2021 |                  | 19.2                  |                  |                   |                   | 3.0    | 6.8      |      |      |      |

34 <sup>a</sup> Winter mean are December-January-February averages and summer mean are June-July-August averages unless  
 35 otherwise noted.

36 <sup>b</sup> Winter mean fine particulate nitrate at the Institute of Atmospheric Physics (IAP) site are January-February-March  
 37 averages (Lei et al., 2021). Winter data for year 2015 and year 2018 are Q-ACSM NR-PM<sub>1</sub>. Winter data for year 2019  
 38 and 2020 are ToF-ACSM NR-PM<sub>2.5</sub>. Summer data for year 2015 (1 June - 3 July and 15 August - 31 August) are AMS  
 39 NR-PM<sub>1</sub>. Summer data for years 2018, 2019, 2020, and 2021 are ACSM NR-PM<sub>2.5</sub>.

40 <sup>c</sup> PM<sub>2.5</sub> nitrate at Tsinghua campus from 2017 to 2021 are measured by Monitor for AeRosols and Gases (MARGA,  
 41 Metrohm Ltd., Switzerland) (Xu et al., 2019). Winter mean are January-February-March averages. PM<sub>1</sub> nitrate in  
 42 summer 2015 is from Li et al. (2018).

43 <sup>d</sup> Data is from ref Liu et al. (2019).

44 <sup>e</sup> Data is measured by an ambient ion monitor (AIM, URG-9000D/USA)(Jo et al., 2020; Jeong et al., 2022).

45 <sup>f</sup> PM<sub>1</sub> nitrate at the Korea Institute of Science and Technology (KIST) site is HR-ToF-AMS NR-PM<sub>1</sub> (Kim et al.,  
 46 2017). Winter mean concentration are averaged from 5 December 2015 to 21 January 2016 for year 2016 (Kim et al.,  
 47 2017), from 1 January 2017 to 10 February 2017 for year 2017, from 17 January 2018 to 22 February 2018 for year  
 48 2018, and from 22 February 2019 to 2 April 2019 for year 2019 (Kim et al., 2020). Summer mean concentration are  
 49 averaged from 27 July to 31 August for year 2016, from 6 August to 31 August for year 2018, from 13 August to 31  
 50 August for year 2020.

51

52 **References**

- 53 Jeong, J. I., Seo, J., and Park, R. J.: Compromised Improvement of Poor Visibility Due to PM Chemical  
54 Composition Changes in South Korea, *Remote Sens.*, 14, 5310, <https://doi.org/10.3390/rs14215310>,  
55 2022.
- 56 Jo, Y.-J., Lee, H.-J., Jo, H.-Y., Woo, J.-H., Kim, Y., Lee, T., Heo, G., Park, S.-M., Jung, D., Park, J., and  
57 Kim, C.-H.: Changes in inorganic aerosol compositions over the Yellow Sea area from impact of  
58 Chinese emissions mitigation, *Atmos. Res.*, 240, 104948,  
59 <https://doi.org/10.1016/j.atmosres.2020.104948>, 2020.
- 60 Kim, H., Zhang, Q., and Sun, Y.: Measurement report: Characterization of severe spring haze episodes and  
61 influences of long-range transport in the Seoul metropolitan area in March 2019, *Atmos. Chem. Phys.*,  
62 20, 11527-11550, <https://doi.org/10.5194/acp-20-11527-2020>, 2020.
- 63 Kim, H., Zhang, Q., Bae, G. N., Kim, J. Y., and Lee, S. B.: Sources and atmospheric processing of winter  
64 aerosols in Seoul, Korea: insights from real-time measurements using a high-resolution aerosol mass  
65 spectrometer, *Atmos. Chem. Phys.*, 17, 2009-2033, <https://doi.org/10.5194/acp-17-2009-2017>, 2017.
- 66 Lei, L., Zhou, W., Chen, C., He, Y., Li, Z., Sun, J., Tang, X., Fu, P., Wang, Z., and Sun, Y.: Long-term  
67 characterization of aerosol chemistry in cold season from 2013 to 2020 in Beijing, China, *Environ.*  
68 *Pollut.*, 268, 115952, <https://doi.org/10.1016/j.envpol.2020.115952>, 2021.
- 69 Li, H., Zhang, Q., Zheng, B., Chen, C., Wu, N., Guo, H., Zhang, Y., Zheng, Y., Li, X., and He, K.: Nitrate-  
70 driven urban haze pollution during summertime over the North China Plain, *Atmos. Chem. Phys.*, 18,  
71 5293-5306, <https://doi.org/10.5194/acp-18-5293-2018>, 2018.
- 72 Liu, M., Huang, X., Song, Y., Tang, J., Cao, J., Zhang, X., Zhang, Q., Wang, S., Xu, T., Kang, L., Cai, X.,  
73 Zhang, H., Yang, F., Wang, H., Yu, J. Z., Lau, A. K. H., He, L., Huang, X., Duan, L., Ding, A., Xue,  
74 L., Gao, J., Liu, B., and Zhu, T.: Ammonia emission control in China would mitigate haze pollution  
75 and nitrogen deposition, but worsen acid rain, *Proc. Natl. Acad. Sci. USA*, 116, 7760-7765,  
76 <https://doi.org/10.1073/pnas.1814880116>, 2019.
- 77 Xu, Q., Wang, S., Jiang, J., Bhattarai, N., Li, X., Chang, X., Qiu, X., Zheng, M., Hua, Y., and Hao, J.:  
78 Nitrate dominates the chemical composition of PM<sub>2.5</sub> during haze event in Beijing, China, *Sci. Total*  
79 *Environ.*, 689, 1293-1303, <https://doi.org/10.1016/j.scitotenv.2019.06.294>, 2019.
- 80 Zhai, S., Jacob, D. J., Wang, X., Liu, Z., Wen, T., Shah, V., Li, K., Moch, J. M., Bates, K. H., Song, S.,  
81 Shen, L., Zhang, Y., Luo, G., Yu, F., Sun, Y., Wang, L., Qi, M., Tao, J., Gui, K., Xu, H., Zhang, Q.,  
82 Zhao, T., Wang, Y., Lee, H. C., Choi, H., and Liao, H.: Control of particulate nitrate air pollution in  
83 China, *Nat. Geosci.*, 14, 389-395, <https://doi.org/10.1038/s41561-021-00726-z>, 2021.

84
